# Supplementary material for: Prevalence and incidence of dental fluorosis in India: protocol for a systematic review and Meta-analysis
Source: Research Square preprint supplement (doi:10.21203/rs.3.rs-332595/v1), 2021-03-26
Supplement: Supplementary file 1 [file f290bd9cc434b53adb6dc0a7.docx]

KEY CONCEPTS

1. Dental Fluorosis

Entry terms: Dental Fluoroses;; Dental Fluorosis; Mottled Enamel; Enamel, Mottled; Enamels, Mottled; Mottled Enamels; “Fluoride Poisoning”, Endemic fluorosis

"fluorosis, dental"[MeSH Terms] OR "fluorosis, dental/epidemiology"[MeSH Terms] OR "fluorosis, dental/statistics and numerical data"[MeSH Terms] OR "fluoride poisoning/epidemiology"[MeSH Terms] OR "dental fluoros*"[Text Word] OR "endemic fluoros*"[Text Word] OR "mottled enamel*"[Text Word]

1. Prevalence

Entry terms: *epidemiology*, **Dental Health Surveys,** “Occurrence”, “Incidences”, Incidence, Prevalence distribution, cases, Prevalences, Prevalence, Period, Point Prevalences

"Prevalence"[MeSH Terms] OR "Epidemiology"[MeSH Terms:noexp] OR "Epidemiology"[MeSH Subheading] OR "point prevalence*"[Text Word] OR "incidence"[MeSH Terms] OR "incidence*"[Text Word] OR "Occurrence"[Text Word] OR "Epidemiology"[Text Word]

1. India

"india"[MeSH Terms] OR India[Text Word]

Final search strategies for Pubmed

("fluorosis, dental"[MeSH Terms] OR "fluorosis, dental/epidemiology"[MeSH Terms] OR "fluorosis, dental/statistics and numerical data"[MeSH Terms] OR "fluoride poisoning/epidemiology"[MeSH Terms] OR "dental fluoros*"[Text Word] OR "endemic fluoros*"[Text Word] OR "mottled enamel*"[Text Word]) AND ("Prevalence"[MeSH Terms] OR "Epidemiology"[MeSH Terms:noexp] OR "Epidemiology"[MeSH Subheading] OR "point prevalence*"[Text Word] OR "incidence"[MeSH Terms] OR "incidence*"[Text Word] OR "Occurrence"[Text Word] OR "Epidemiology"[Text Word]) AND ("India"[MeSH Terms] OR "India"[Text Word])
